# Supplementary material for: A Longitudinal Study Exploring the Influence of Weight Bias Internalization and Experiences of Perceived Discrimination on Pathological Eating Among Bariatric Surgery Patients
Source: Research Square preprint supplement (doi:10.21203/rs.3.rs-7040023/v1), 2025-07-29
Supplement: Supplementary file 1 [file 506dd8872fa564631437a68f.docx]

**Supplementary Materials**

**Table S1.** Fixed Effects from Multilevel Models Predicting Emotional Eating Subscale Outcomes Across Time

| **Outcome Variable**  **(models)** | **Predictors** | **B (SE)** | **p-value** | **95% CI**  **(LL, UL)** |
| --- | --- | --- | --- | --- |
| **EES - Anger** | (Intercept) | 19.98 (0.48) | **< .001***** | 19.04, 20.92 |
| WBIS | 4.49 (0.55) | **< .001***** | 3.42, 5.56 |
| Time 2 (6m post-MBS) | -3.91 (0.64) | **< .001***** | -5.16, -2.66 |
| Time 3 (12m post-MBS) | -3.18 (0.74) | **< .001***** | -4.63, -1.73 |
| EPD | 1.06 (0.44) | **0.02*** | 0.20, 1.92 |
| WBIS × 6m post-MBS | -2.34 (0.79) | **0.01**** | -3.88, -0.79 |
| WBIS × 12m post-MBS | -2.39 (0.88) | **0.01**** | -4.12, -0.67 |
| EPD × 6m post-MBS | -0.38 (0.63) | 0.55 | -1.61, 0.86 |
| EPD × 12m post-MBS | 0.21 (0.82) | 0.80 | -1.40, 1.81 |
| **EES - Anxiety** | (Intercept) | 16.28 (0.37) | **< .001***** | 15.56, 16.99 |
| WBIS | 2.61 (0.42) | **< .001***** | 1.80, 3.42 |
| Time 2 (6m post-MBS) | -2.94 (0.48) | **< .001***** | -3.89, -2.00 |
| Time 3 (12m post-MBS) | -2.24 (0.56) | **< .001***** | -3.34, -1.15 |
| EPD | 1.20 (0.33) | **< .001***** | 0.55, 1.86 |
| WBIS × 6m post-MBS | -1.24 (0.60) | **0.04*** | -2.42, -0.07 |
| WBIS × 12m post-MBS | -0.89 (0.66) | 0.18 | -2.18, 0.41 |
| EPD × 6m post-MBS | -0.32 (0.48) | 0.51 | -1.25, 0.62 |
| EPD × 12m post-MBS | -0.13 (0.62) | 0.83 | -1.34, 1.08 |
| **EES - Depression** | (Intercept) | 12.15 (0.26) | **< .001***** | 11.65, 12.66 |
| WBIS | 2.15 (0.29) | **< .001***** | 1.59, 2.72 |
| Time 2 (6m post-MBS) | -2.81 (0.33) | **< .001***** | -3.46, -2.16 |
| Time 3 (12m post-MBS) | -2.12 (0.38) | **< .001***** | -2.87, -1.37 |
| EPD | 0.66 (0.23) | **0.01**** | 0.21, 1.11 |
| WBIS × 6m post-MBS | -0.57 (0.41) | 0.17 | -1.37, 0.23 |
| WBIS × 12m post-MBS | -0.65 (0.45) | 0.15 | -1.53, 0.23 |
| EPD × 6m post-MBS | -0.20 (0.33) | 0.55 | -0.84, 0.44 |
| EPD × 12m post-MBS | 0.31 (0.42) | 0.46 | -0.51, 1.14 |

**Abbreviations:** WBIS, weight bias internalization scale; EPD, experiences of perceived discrimination; EES, emotional eating scale

WBIS and EPD were standardized using z-scores (i.e., mean-centered and divided by their standard deviation)

Time 1 = preoperative; Time 2 = 6-months post-MBS; Time 3 = 12-months post-MBS
